# Supplementary material
Source: PubMed Central journal article supplement (PMC7960124)
Supplement: 15-00649.pdf [file 15-00649.pdf]

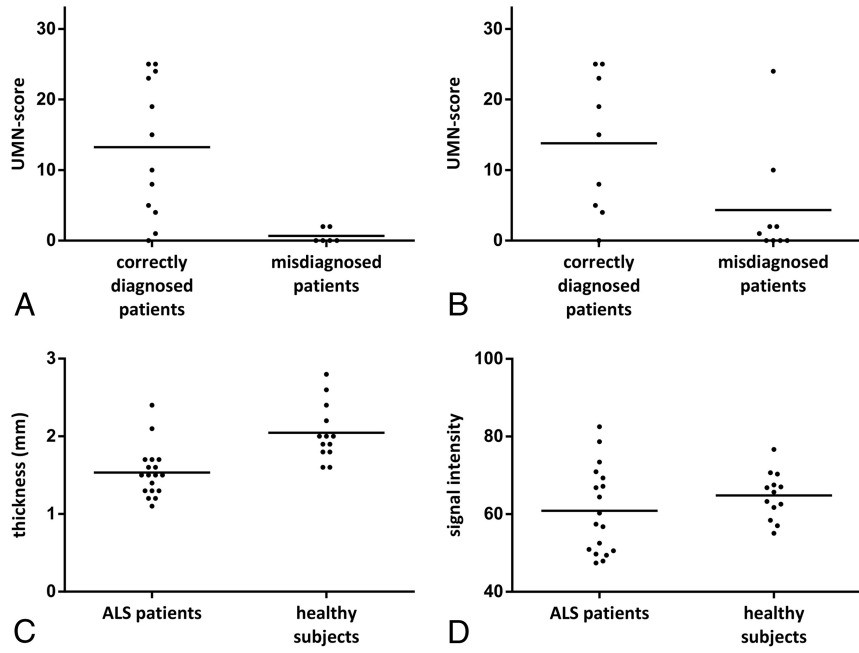

**ON-LINE FIG 1.** Scatterplot of UMN scores in correctly diagnosed and misdiagnosed patients with ALS derived from readers 1 (A) and 2 (B). Cortical thickness (C) and signal intensity (D) in the deeper layers of the M1 in patients with ALS and HS.

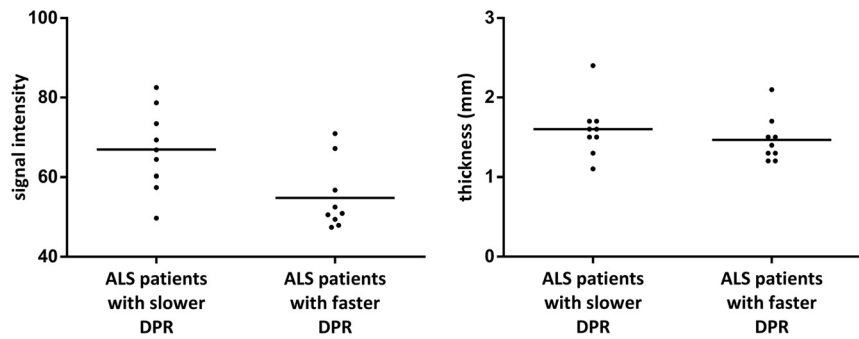

**ON-LINE FIG 2.** Signal intensity and cortical thickness of the deeper layers of the M1 in patients with slower and faster disease progression rate.

**On-line Table 1: Clinical and demographic data of patients with ALS**

| Patient No. | Sex | Family History | Onset       | Age at Onset (yr) | DD (mo) | ALSFRS-R at Time of MRI |            | UMN Score at Time of MRI (0–33) | Bulbar UMN Score (0–1) | UMN Score of Right Upper Limb (0–8) |      | UMN Score of Left Upper Limb (0–8) |      | UMN Score of Right Lower Limb (0–8) | UMN Score of Left Lower Limb (0–8) | DPR  |
|-------------|-----|----------------|-------------|-------------------|---------|-------------------------|------------|---------------------------------|------------------------|-------------------------------------|------|------------------------------------|------|-------------------------------------|------------------------------------|------|
|             |     |                |             |                   |         | MRI (0–48)              | MRI (0–41) |                                 |                        | Right                               | Left | Right                              | Left |                                     |                                    |      |
| 1           | M   | Negative       | Lower limbs | 63                | 18      | 41                      | 41         | 0                               | 0                      | 0                                   | 0    | 0                                  | 0    | 0                                   | 0                                  | 0.39 |
| 2           | F   | Negative       | Lower limbs | 62                | 8       | 41                      | 41         | 1                               | 0                      | 0                                   | 0    | 0                                  | 0    | 0                                   | 1                                  | 0.88 |
| 3           | M   | Negative       | Lower limbs | 65                | 44      | 35                      | 68         | 8                               | 0                      | 3                                   | 3    | 3                                  | 1    | 1                                   | 1                                  | 0.30 |
| 4           | M   | Negative       | Lower limbs | 67                | 12      | 42                      | 42         | 2                               | 0                      | 0                                   | 0    | 0                                  | 1    | 1                                   | 1                                  | 0.50 |
| 5           | M   | Negative       | Lower limbs | 48                | 16      | 43                      | 43         | 4                               | 0                      | 0                                   | 0    | 0                                  | 2    | 2                                   | 2                                  | 0.31 |
| 6           | M   | Negative       | Lower limbs | 65                | 18      | 35                      | 35         | 19                              | 0                      | 3                                   | 2    | 7                                  | 7    | 7                                   | 7                                  | 0.72 |
| 7           | M   | Negative       | Lower limbs | 41                | 8       | 42                      | 42         | 15                              | 0                      | 0                                   | 0    | 3                                  | 5    | 5                                   | 7                                  | 0.75 |
| 8           | F   | Positive       | Lower limbs | 55                | 26      | 36                      | 24         | 24                              | 0                      | 6                                   | 6    | 6                                  | 6    | 6                                   | 6                                  | 0.46 |
| 9           | F   | Negative       | Upper limbs | 62                | 10      | 33                      | 25         | 25                              | 1                      | 6                                   | 6    | 6                                  | 6    | 6                                   | 6                                  | 1.50 |
| 10          | M   | Negative       | Upper limbs | 66                | 10      | 41                      | 41         | 0                               | 0                      | 0                                   | 0    | 0                                  | 0    | 0                                   | 0                                  | 0.70 |
| 11          | M   | Negative       | Upper limbs | 46                | 16      | 23                      | 23         | 23                              | 0                      | 4                                   | 4    | 4                                  | 8    | 7                                   | 7                                  | 1.56 |
| 12          | F   | Negative       | Upper limbs | 63                | 46      | 38                      | 38         | 2                               | 0                      | 0                                   | 0    | 0                                  | 1    | 1                                   | 1                                  | 0.22 |
| 13          | M   | Negative       | Lower limbs | 69                | 31      | 41                      | 41         | 10                              | 0                      | 3                                   | 3    | 3                                  | 2    | 2                                   | 2                                  | 0.23 |
| 14          | M   | Negative       | Upper limbs | 84                | 5       | 41                      | 25         | 25                              | 1                      | 7                                   | 7    | 5                                  | 5    | 5                                   | 5                                  | 1.40 |
| 15          | M   | Negative       | Upper limbs | 48                | 17      | 43                      | 43         | 2                               | 0                      | 0                                   | 0    | 1                                  | 0    | 1                                   | 1                                  | 0.29 |
| 16          | M   | Negative       | Lower limbs | 56                | 14      | 43                      | 43         | 0                               | 0                      | 0                                   | 0    | 0                                  | 0    | 0                                   | 0                                  | 0.36 |
| 17          | M   | Negative       | Upper limbs | 62                | 10      | 45                      | 45         | 1                               | 0                      | 1                                   | 1    | 0                                  | 0    | 0                                   | 0                                  | 0.30 |
| 18          | M   | Negative       | Upper limbs | 65                | 5       | 45                      | 45         | 0                               | 0                      | 0                                   | 0    | 0                                  | 0    | 0                                   | 0                                  | 0.60 |
| 19          | F   | Negative       | Lower limbs | 58                | 12      | 40                      | 40         | 5                               | 0                      | 1                                   | 1    | 0                                  | 2    | 2                                   | 2                                  | 0.67 |
| 20          | M   | Negative       | Upper limbs | 52                | 15      | 46                      | 46         | 0                               | 0                      | 0                                   | 0    | 0                                  | 0    | 0                                   | 0                                  | 0.13 |
| 21          | M   | Negative       | Lower limbs | 69                | 8       | 38                      | 38         | 24                              | 0                      | 6                                   | 6    | 6                                  | 7    | 5                                   | 5                                  | 1.25 |
| 22          | M   | Negative       | Lower limbs | 54                | 13      | 44                      | 44         | 0                               | 0                      | 0                                   | 0    | 0                                  | 0    | 0                                   | 0                                  | 0.31 |

**Note:**—DD indicates disease duration.

**On-line Table 2: Scale for clinical evaluation of upper motor neuron impairment<sup>a</sup>**

| Scale                                         |
|-----------------------------------------------|
| Bulbar                                        |
| Pseudobulbar affect (0 = absent; 1 = present) |
| Upper limbs                                   |
| Spasticity (0–2) <sup>b</sup>                 |
| Triceps reflex (0–2) <sup>c</sup>             |
| Biceps reflex (0–2) <sup>c</sup>              |
| Brachioradialis reflex (0–2) <sup>c</sup>     |
| Lower limbs                                   |
| Spasticity (0–2) <sup>b</sup>                 |
| Patellar reflex (0–2) <sup>c</sup>            |
| Ankle reflex (0–2) <sup>c</sup>               |
| Clonus (0–1) <sup>d</sup>                     |
| Babinski sign (0–1) <sup>d</sup>              |
| Maximum overall range 0–33                    |

<sup>a</sup>To obtain a parametric scale of UMN involvement, a composite score of upper motor neuron “burden” was calculated, by totalling the number of pathologic UMN signs on examination.<sup>8,22</sup> The scale considers, bilaterally, biceps, triceps, brachioradialis, patellar and ankle reflexes, extensor plantar responses, clonus presence, pseudobulbar signs, and spasticity (assessed by a scoring based on the Ashworth spasticity scale<sup>23</sup>).

<sup>b</sup>Spasticity scoring: Ashworth 1 = 0; Ashworth 2–3 = 1; Ashworth 4–5 = 2.

<sup>c</sup>Reflex scoring: normal or absent = 0; slightly pathologically brisk = 1; retained reflex in a weak or wasted limb = 1; polykinetic = 2.

<sup>d</sup>Clonus and Babinski sign: 0 = absent; 1 = present.

**On-line Table 3: Summary of the results: UMN score and DPR in correctly diagnosed and misdiagnosed patients with ALS<sup>a</sup>**

|               | Correctly Diagnosed Patients | Misdiagnosed Patients   | P Value <sup>b</sup> |
|---------------|------------------------------|-------------------------|----------------------|
| UMN score     |                              |                         |                      |
| First reader  | 13 ± 10 (0–25)               | 1 ± 1 (0–2)             | .003                 |
| Second reader | 14 ± 10 (0–25)               | 4 ± 8 (0–24)            | .028                 |
| DPR           |                              |                         |                      |
| First reader  | 0.85 ± 0.48 (0.23–1.56)      | 0.33 ± 0.20 (0.13–0.70) | .019                 |
| Second reader | 0.87 ± 0.49 (0.30–1.56)      | 0.48 ± 0.38 (0.13–1.25) | .066                 |

<sup>a</sup>Results are reported as mean value ± SD (range).

<sup>b</sup>Mann-Whitney *U* test.

**On-line Table 4: Cortical thickness and signal intensity of deep layers of M1 in patients with ALS and healthy subjects<sup>a</sup>**

|                         | Patients with ALS       | Healthy Subjects       | P Value <sup>b</sup> |
|-------------------------|-------------------------|------------------------|----------------------|
| Cortical thickness (mm) | 1.5 ± 0.3 (1.1–2.4)     | 2.0 ± 0.4 (1.6–2.8)    | <.001                |
| Signal intensity        | 60.9 ± 11.1 (47.4–82.5) | 64.8 ± 6.0 (55.1–76.7) | .262                 |

<sup>a</sup>Results are reported as mean value ± SD (range).

<sup>b</sup>Mann-Whitney *U* test.

**On-line Table 5: Correlations of morphometric parameters with clinical scores<sup>a</sup>**

|                         | UMN Score                           | DPR                                 | ALSFRS-R                           |
|-------------------------|-------------------------------------|-------------------------------------|------------------------------------|
| Cortical thickness (mm) | $r = -0.59, P \text{ value} < .001$ | $r = -0.47, P \text{ value} = .051$ | $r = 0.49, P \text{ value} = .039$ |
| Signal intensity        | $r = -0.47, P \text{ value} < .001$ | $r = -0.60, P \text{ value} = .009$ | $r = 0.45, P \text{ value} = .061$ |

<sup>a</sup>Spearman correlation.

**On-line Table 6: Distribution of morphometric parameters among subgroups of patients with slower and faster DPR<sup>a</sup>**

|                         | Patients with Slower DPR | Patients with Faster DPR | P Value <sup>b</sup> |
|-------------------------|--------------------------|--------------------------|----------------------|
| Cortical thickness (mm) | 1.6 ± 0.3 (1.1–2.4)      | 1.5 ± 0.3 (1.2–2.1)      | .285                 |
| Signal intensity        | 67.0 ± 10.4 (49.7–82.5)  | 54.9 ± 8.6 (47.4–70.9)   | .024                 |

<sup>a</sup>Results are reported as mean value ± SD (range).

<sup>b</sup>Mann-Whitney *U* test.
